# Supplementary material for: Interleukin-6 trans-signaling increases the expression of carcinoembryonic antigen-related cell adhesion molecules 5 and 6 in colorectal cancer cells
Source: PubMed Central journal article supplement (PMC4682226; doi:10.1186/s12885-015-1950-1), 2015-12-16

### CEACAM5

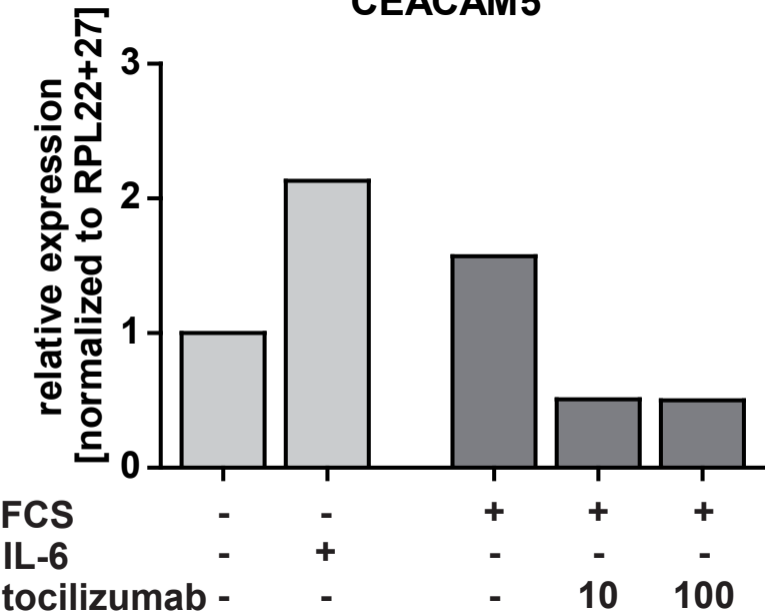

### CEACAM6

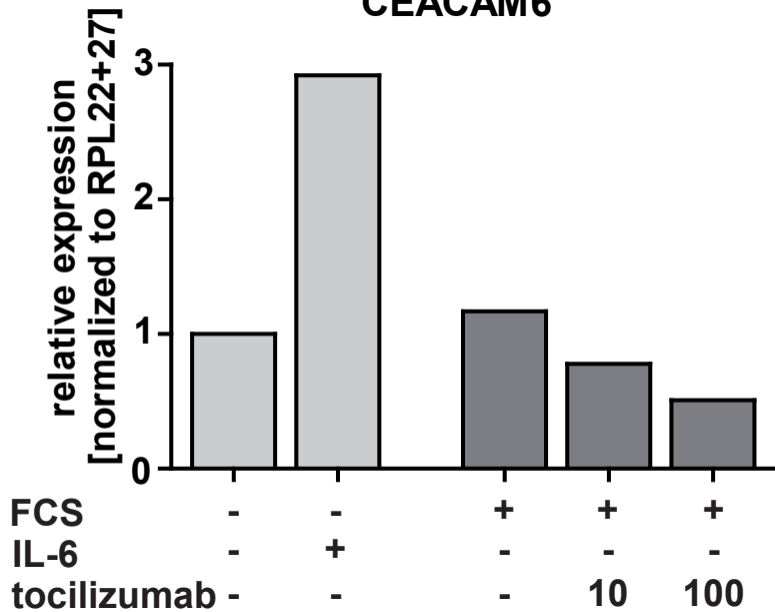

Supplement: 12885_2015_1950_MOESM1_ESM.pdf [file 12885_2015_1950_MOESM1_ESM.pdf]
